# Supplementary material for: In Vitro Assessment of the Role of p53 on Chemotherapy Treatments in Neuroblastoma Cell Lines
Source: MDPI journal article supplement (doi:10.3390/ph14111184), 2021-11-19
Supplement: s1 [file s1]

A

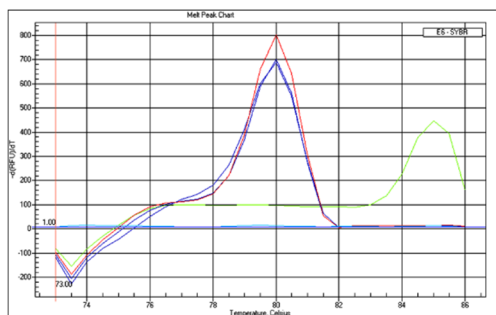

B

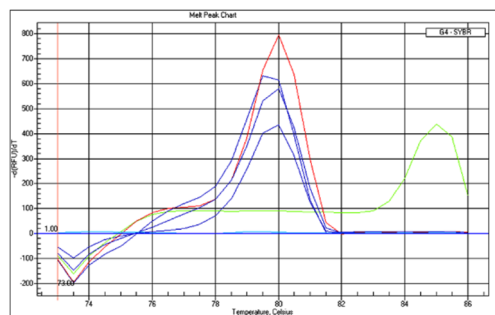

C

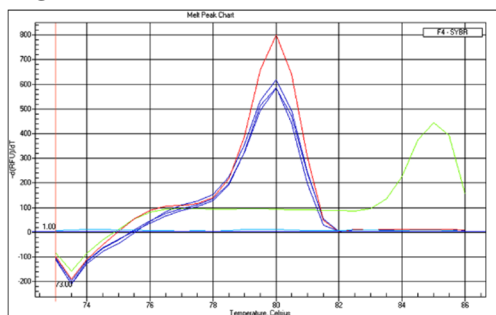

D

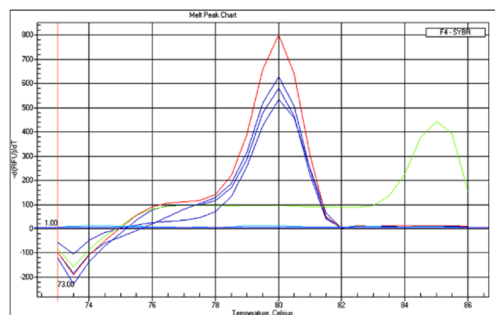

E

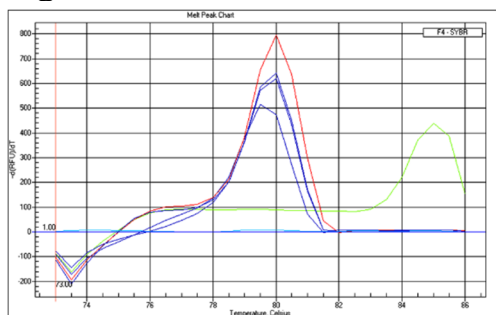

F

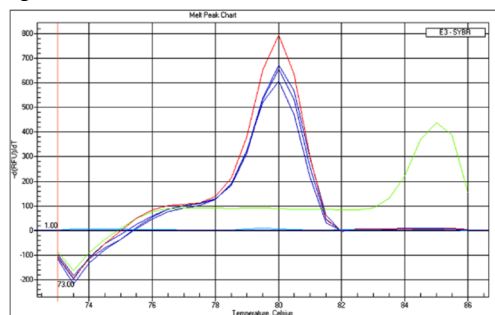

G

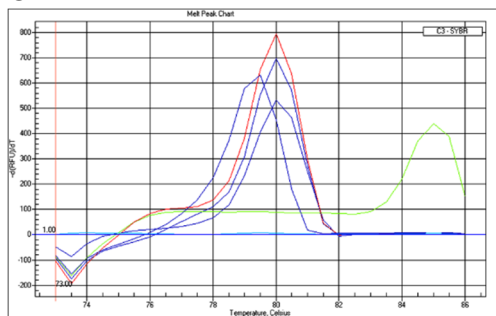

H

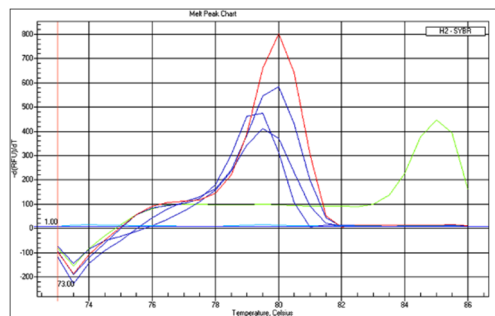

I

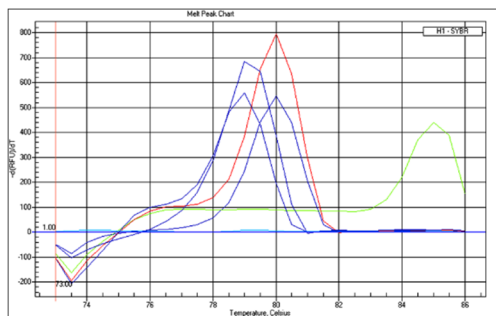

J

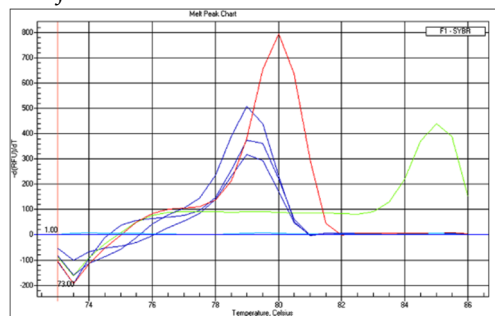

K

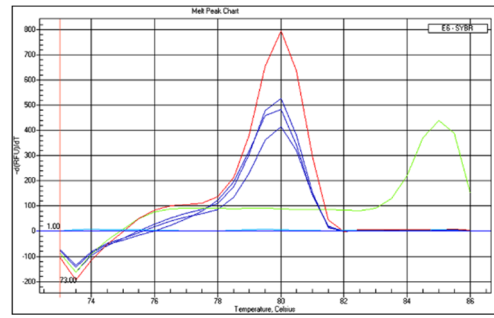

**Figure S1. p14ARF MCA-Meth results.** SK-N-MC (A), SK-N-SH (B), SK-N-DZ (C), Be(2)C (D), SK-N-Be(2) (E), SK-N-FI (F), Kelly (G), MHH-NB-11 (H), IMR-32 (I), SH-SY5Y (J) and MC-IXC (K). Denaturation curves of the PCR products are shown. Red: DNA extracted from blood cells (unmethylated control). Green: *in vitro* methylated DNA (methylation control). Blue: the corresponding cell line (n = 3).
