# Supplementary material for: In Vitro Assessment of the Role of p53 on Chemotherapy Treatments in Neuroblastoma Cell Lines
Source: MDPI journal article supplement (doi:10.3390/ph14111184), 2021-11-19
Supplement: s1 [file s1]

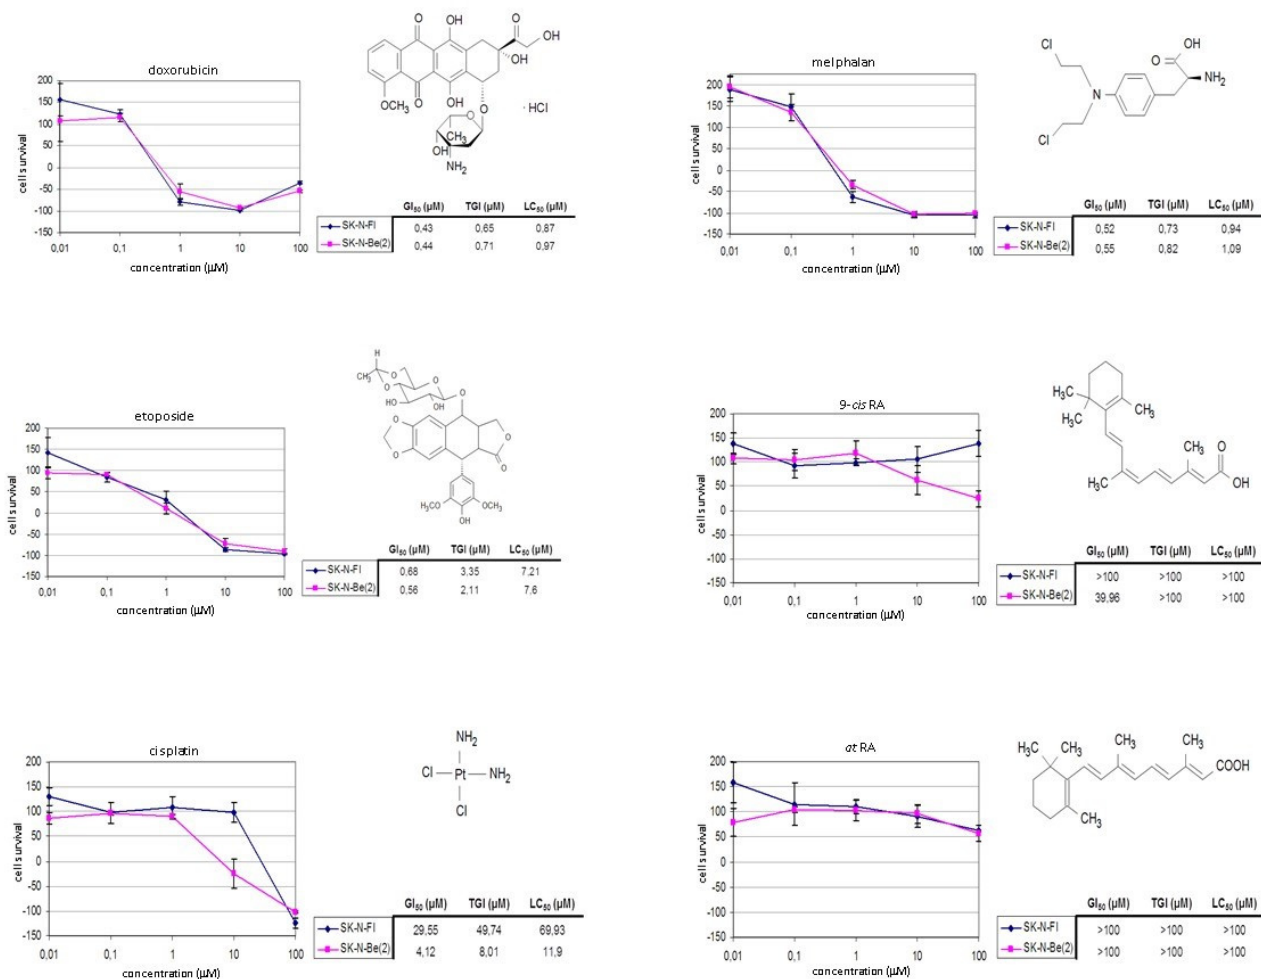

**Figure S3.** Analysis of cytotoxicity induced by doxorubicin, etoposide, cisplatin, melphalan, 9-*cis*-RA and *at*RA in neuroblastoma cell lines SK-N-FI and SK-N-Be(2). The figure shows the dose-response curves obtained after 72 h of treatment. Data are presented as the mean ± SEM of at least 3 independent experiments.
