# Supplementary material for: In Vitro Assessment of the Role of p53 on Chemotherapy Treatments in Neuroblastoma Cell Lines
Source: MDPI journal article supplement (doi:10.3390/ph14111184), 2021-11-19
Supplement: s1 [file s1]

Table S1-1. Status of the SK-NF-I cell line according to the IARC TP53 database (<https://p53.iarc.fr/CellLines.aspx>; accessed on 8 July 2021).

| Name    | Topography | Morphology         | ATCC     | Cosmic | depmap     | Sex | Age | Status | Exon   | cDNA     | Protein | PubMed   |
|---------|------------|--------------------|----------|--------|------------|-----|-----|--------|--------|----------|---------|----------|
| SK-N-FI | NERVES     | Neuroblastoma, NOS | CRL-2142 | 688087 | ACH-000341 | M   | 11  | MUT    | 7-exon | c.737T>G | p.M246R | 15188009 |

Table S1-2. Neuroblastoma cell lines with a mutated codon 135, as identified in the database.

| Name         | Topography | Morphology         | ATCC | Cosmic | depmap     | Sex | Age | Status | Exon   | cDNA     | Protein | PubMed   |
|--------------|------------|--------------------|------|--------|------------|-----|-----|--------|--------|----------|---------|----------|
| IMR/KAT100   | NERVES     | Neuroblastoma, NOS |      |        |            | NA  |     | MUT    | 5-exon | c.404G>T | p.C135F | 17974978 |
| KP-N-YS      | NERVES     | Neuroblastoma, NOS |      | 946363 | ACH-002261 | NA  | 4   | MUT    | 5-exon | c.404G>T | p.C135F | 15188009 |
| SKNBE(2c)    | NERVES     | Neuroblastoma, NOS |      |        |            | NA  |     | MUT    | 5-exon | c.404G>T | p.C135F | 11196202 |
| sknbe2       | NERVES     | Neuroblastoma, NOS |      |        | ACH-000312 | M   | 2   | MUT    | 5-exon | c.404G>T | p.C135F | 22460905 |
| SMS-BC       | NERVES     | Neuroblastoma, NOS |      |        |            | NA  |     | MUT    | 5-exon | c.404G>T | p.C135F | 9288759  |
| UKF-NB-3rVCR | NERVES     | Neuroblastoma, NOS |      |        |            | NA  |     | MUT    | 5-exon | c.404G>T | p.C135F | 17974978 |
