# Supplementary material for: In Vitro Assessment of the Role of p53 on Chemotherapy Treatments in Neuroblastoma Cell Lines
Source: Pharmaceuticals (Basel). 2021 Nov 19;14(11):1184. doi: 10.3390/ph14111184 (PMC8624165; doi:10.3390/ph14111184)
Supplement: Supplementary file 1 [file pharmaceuticals-14-01184-s001.zip]

Archive with 4 entries (4 files):
- Figure S1.pdf
- Figure S2.pdf
- Figure S3.pdf
- Supplementary Table S1.pdf
